# Supplementary material
Source: publisher figshare collection journal article supplement (https://diabetesjournals.figshare.com/articles/dataset/_/20360028)
Supplement: Supplementary file 1 [file 36392511]

**Supplementary Table 1.** Definitions and sources of information for MVD in the UK Biobank.

| <b>Retinopathy ICD-9</b>                                                                                                                                                                                                                                                                                                                                                                                                                                                                                                                                                   | <b>Neuropathy ICD-9</b>                                                                                                                                                                                                                                                                                                                                                                                                                                                         | <b>CKD ICD-9</b>                                                                                                                                                                                                                                                                                                                                              |
|----------------------------------------------------------------------------------------------------------------------------------------------------------------------------------------------------------------------------------------------------------------------------------------------------------------------------------------------------------------------------------------------------------------------------------------------------------------------------------------------------------------------------------------------------------------------------|---------------------------------------------------------------------------------------------------------------------------------------------------------------------------------------------------------------------------------------------------------------------------------------------------------------------------------------------------------------------------------------------------------------------------------------------------------------------------------|---------------------------------------------------------------------------------------------------------------------------------------------------------------------------------------------------------------------------------------------------------------------------------------------------------------------------------------------------------------|
| 2504: Diabetes with ophthalmic manifestations                                                                                                                                                                                                                                                                                                                                                                                                                                                                                                                              | 2505: Diabetes with neurological manifestations<br><br>3572: Polyneuropathy in diabetes                                                                                                                                                                                                                                                                                                                                                                                         | 2503: Diabetes with renal manifestations<br><br>4039: Hypertensive renal disease, not specified as malignant or benign<br>4401: Atherosclerosis of renal artery<br>5829: Chronic glomerulonephritis, unspecified<br>5845: Acute renal failure with lesion of tubular necrosis<br>5849: Acute renal failure, unspecified                                       |
| <b>Retinopathy ICD-10</b>                                                                                                                                                                                                                                                                                                                                                                                                                                                                                                                                                  | <b>Neuropathy ICD-10</b>                                                                                                                                                                                                                                                                                                                                                                                                                                                        | <b>CKD ICD-10</b>                                                                                                                                                                                                                                                                                                                                             |
| E10.3: Insulin-dependent diabetes mellitus with ophthalmic complications<br>E11.3: Non-insulin-dependent diabetes mellitus with ophthalmic complications<br>E12.3: Malnutrition-related diabetes mellitus with ophthalmic complications<br>E13.3: Other specified diabetes mellitus with ophthalmic complications<br>E14.3: Unspecified diabetes mellitus with ophthalmic complications<br>H28.0: Diabetic cataract<br>H33: retinal detachments and breaks<br>H35.3: Degeneration of macula and posterior pole<br><br>H36.0: Diabetic retinopathy<br><br>H40-H42: Glaucoma | E10.4: Insulin-dependent diabetes mellitus with neurological complications<br>E11.4: Non-insulin-dependent diabetes mellitus with neurological complications<br>E13.4: with neurological complications<br>E14.4: Other specified diabetes mellitus with neurological complications<br><br>G59.0: Diabetic mononeuropathy<br><br>G62.9: Polyneuropathy, unspecified<br><br>G63.2: Diabetic polyneuropathy<br><br>G99.0: Autonomic neuropathy in endocrine and metabolic diseases | E10.2: With renal complications<br><br>E11.2: With renal complications<br><br>E13.2: With renal complications<br><br>E14.2: With renal complications<br><br>N18-N19: Chronic renal failure or Unspecified renal failure<br>N28.0: Other disorders of kidney and ureter, not elsewhere classified<br>I70.1: Atherosclerosis of renal artery (without gangrene) |
| <b>Self-report*</b>                                                                                                                                                                                                                                                                                                                                                                                                                                                                                                                                                        |                                                                                                                                                                                                                                                                                                                                                                                                                                                                                 |                                                                                                                                                                                                                                                                                                                                                               |
| Non-cancer illness code: 20002                                                                                                                                                                                                                                                                                                                                                                                                                                                                                                                                             |                                                                                                                                                                                                                                                                                                                                                                                                                                                                                 |                                                                                                                                                                                                                                                                                                                                                               |

MVD, microvascular disease; CKD, chronic kidney disease; ICD, International Classification of Disease.

\*20002 is the data code used in UK Biobank: Non-cancer illness code.

**Supplementary Table 2.** Equations for eGFR, expressed for specified sex and serum creatinine level.

| <b>Sex</b> | <b>Serum creatinine, <i>mg/dl</i></b> | <b>Equation of eGFR</b>                                                                     |
|------------|---------------------------------------|---------------------------------------------------------------------------------------------|
| Female     | ≤0.7                                  | $144 \times (\text{Scr}/0.7)^{-0.329} \times 0.993^{\text{Age}}$ [ $\times 1.159$ if black] |
| Female     | >0.7                                  | $144 \times (\text{Scr}/0.7)^{-1.209} \times 0.993^{\text{Age}}$ [ $\times 1.159$ if black] |
| Male       | ≤0.9                                  | $141 \times (\text{Scr}/0.9)^{-0.411} \times 0.993^{\text{Age}}$ [ $\times 1.159$ if black] |
| Male       | >0.9                                  | $141 \times (\text{Scr}/0.9)^{-1.209} \times 0.993^{\text{Age}}$ [ $\times 1.159$ if black] |

eGFR, estimated glomerular filtration rate

**Supplementary Table 3.** Definitions and sources of information for HF in the UK Biobank.

---

**ICD-9**

---

Congestive heart failure: 4280

Left heart failure: 4281

Heart failure, unspecified: 4289

---

**ICD-10**

---

Hypertensive heart disease with (congestive) heart failure: I11.0

Hypertensive heart and renal disease with (congestive) heart failure: I13.0

Hypertensive heart and renal disease with both (congestive) heart failure and renal failure: I13.2

Congestive heart failure: I50.0

Left ventricular failure: I50.1

Heart failure, unspecified: I50.9

---

**Self-report\***

---

Non-cancer illness code: 20002

---

ICD, International Classification of Disease.

\*20002 is the data code used in UK Biobank: Non-cancer illness code.

**Supplementary Table 4.** The proportion of different antihyperglycemic drug classes and antihypertensive drug classes.

| <b>Drug classes</b>                        | <b>T1DM</b>   | <b>T2DM</b>   |
|--------------------------------------------|---------------|---------------|
| <b>Antihyperglycemic drug classes</b>      |               |               |
| Insulin alone                              | 1,368 (79.9%) | 1,492 (5.2%)  |
| Metformin alone                            | 25 (1.5%)     | 6,978 (24.4%) |
| Other antihyperglycemic drug classes alone | 32 (1.9%)     | 5,380 (18.8%) |
| 2 drug classes                             | 242 (14.1%)   | 6,240 (21.8%) |
| ≥3 drug classes                            | 31 (1.8%)     | 1,140 (4.0%)  |
| With DM but not treated                    | 15 (0.9%)     | 7,394 (25.8%) |
| <b>Antihypertensive drug classes</b>       |               |               |
| No hypertension                            | 455 (26.6%)   | 4,741 (16.6%) |
| ACEI alone                                 | 245 (14.3%)   | 2,845 (9.9%)  |
| ARB alone                                  | 116 (6.8%)    | 1,512 (5.3%)  |
| BB alone                                   | 65 (3.8%)     | 2,217 (7.7%)  |
| CCB alone                                  | 89 (5.2%)     | 2,308 (8.1%)  |
| Other antihypertensive drug classes alone  | 240 (14.0%)   | 4,412 (15.4%) |
| 2 drug classes                             | 178 (10.4%)   | 3,756 (13.1%) |
| ≥3 drug classes                            | 34 (2.0%)     | 689 (2.4%)    |
| With hypertension but not treated          | 291 (17.0%)   | 6,144 (21.5%) |

Values are presented by numbers and percentages.

ACEI, angiotensin-converting enzyme inhibitor; ARB, angiotensin-receptor blocker; BB,  $\beta$ -blocker; CCB, calcium channel blocker; DM, diabetes mellitus.

Percentages may not total 100 because of rounding.

**Supplementary Table 5.** Summary of missing variables from main analyses of individuals with type 1 DM or type 2 DM.

|                            | <b>T1DM (<i>n</i> =1,713)</b> |                  | <b>T2DM (<i>n</i> =28,624)</b> |                  |
|----------------------------|-------------------------------|------------------|--------------------------------|------------------|
|                            | <b>N Missing</b>              | <b>% Missing</b> | <b>N Missing</b>               | <b>% Missing</b> |
| HbA1c                      | 143                           | 8.34             | 2,067                          | 7.22             |
| Diabetes duration          | 89                            | 5.19             | 2,811                          | 9.82             |
| Townsend deprivation index | 2                             | 0.12             | 44                             | 0.15             |
| BMI                        | 31                            | 1.81             | 342                            | 1.19             |
| Smoking status             | 3                             | 0.18             | 320                            | 1.12             |
| SBP                        | 3                             | 0.18             | 158                            | 0.55             |
| Heart rate                 | 3                             | 0.18             | 157                            | 0.55             |
| Sedentary time             | 76                            | 4.43             | 1,801                          | 6.29             |
| TC                         | 130                           | 7.58             | 1,998                          | 6.98             |
| HDL                        | 293                           | 17.09            | 4,179                          | 14.59            |
| LDL                        | 134                           | 7.82             | 2,084                          | 7.28             |
| CRP                        | 133                           | 7.76             | 2,088                          | 7.29             |

BMI, body mass index; CRP, C-reactive protein; HDL, high-density lipoprotein; HbA1c, glycated haemoglobin; LDL, low-density lipoprotein cholesterol; SBP, systolic blood pressure; TC, total cholesterol.

**Supplementary Table 6.** Baseline characteristics among participants with T1DM by No. of MVD.

|                                   | No. of MVD          |                     |                     |                     | P value |
|-----------------------------------|---------------------|---------------------|---------------------|---------------------|---------|
|                                   | 0 (n =806)          | 1 (n =623)          | 2 (n =225)          | 3 (n =59)           |         |
| HbA1c, mmol/L                     | 57.0 (50.7-66.1)    | 60.6 (52.2-68.6)    | 65.4 (54.0-74.0)    | 61.1 (50.7-73.0)    | <0.001  |
| DM duration, y                    | 26.0 (14.0-33.0)    | 32.0 (21.0-41.0)    | 32.0 (19.0-41.0)    | 33.0 (28.0-41.0)    | <0.001  |
| Age, y                            | 51.0 (45.0-59.0)    | 56.0 (48.0-62.0)    | 59.0 (52.0-64.0)    | 54.0 (49.0-60.0)    | <0.001  |
| Women, n (%)                      | 380 (47.2)          | 283 (45.4)          | 107 (47.6)          | 23 (39.0)           | 0.607   |
| White, n (%)                      | 747 (92.7)          | 576 (92.5)          | 205 (91.1)          | 57 (96.6)           | 0.551   |
| Townsend deprivation index        | -1.74 (-3.4-1.4)    | -1.2 (-3.2-2.0)     | 0.01 (-3.0-2.6)     | 0.03 (-3.3-2.8)     | 0.002   |
| BMI, kg/m <sup>2</sup>            | 26.2 (23.8-29.7)    | 27.2 (24.3-30.7)    | 28.6 (25.6-31.6)    | 28.1 (24.8-30.6)    | <0.001  |
| Current smokers, n (%)            | 95 (11.8)           | 81 (13.0)           | 30 (13.3)           | 7 (11.9)            | 0.009   |
| SBP, mmHg                         | 135.0 (125.0-149.0) | 141.0 (129.0-153.0) | 146.0 (132.0-160.0) | 155.0 (137.0-166.0) | <0.001  |
| Heart rate, bpm                   | 72.0 (64.0-81.0)    | 73.0 (66.0-83.0)    | 74.0 (67.0-84.0)    | 81.0 (73.0-92.0)    | <0.001  |
| Alcohol consumption, g/d          | 8.6 (0.0-20.0)      | 8.6 (0.0-20.0)      | 2.0 (0.0-14.3)      | 0.3 (0.0-14.3)      | <0.001  |
| Sedentary time, h/d               | 5.0 (3.0-6.0)       | 5.0 (3.5-6.0)       | 5.0 (3.5-6.5)       | 5.0 (4.0-8.5)       | 0.087   |
| TC, mg/dL                         | 4.6 (4.1-5.0)       | 4.5 (4.0-5.0)       | 4.5 (4.0-5.0)       | 4.7 (4.1-5.1)       | 0.381   |
| HDL, mmol/L                       | 1.4 (1.2-1.7)       | 1.4 (1.2-1.7)       | 1.2 (1.1-1.6)       | 1.3 (1.2-1.6)       | <0.001  |
| CRP, mg/L                         | 1.6 (0.7-2.8)       | 1.9 (0.9-3.6)       | 2.2 (1.2-3.9)       | 2.3 (1.6-6.0)       | <0.001  |
| eGFR, ml/min/1.73 m <sup>2</sup>  | 100.5 (92.3-107.6)  | 96.9 (83.6-106.2)   | 88.1 (59.6-99.9)    | 52.2 (39.0-82.3)    | <0.001  |
| History of CHD, n (%)             | 51 (6.3)            | 94 (15.1)           | 61 (27.1)           | 20 (33.9)           | <0.001  |
| History of stroke, n (%)          | 12 (1.5)            | 20 (3.2)            | 16 (7.1)            | 4 (6.8)             | <0.001  |
| Antihyperglycemic drug use, n (%) | 796 (98.8)          | 622 (99.8)          | 224 (99.6)          | 56 (94.9)           | 0.001   |
| Antihypertensive drug use, n (%)  | 308 (38.2)          | 371 (59.6)          | 159 (70.7)          | 46 (78.0)           | <0.001  |
| Statin use, n (%)                 | 467 (57.9)          | 417 (66.9)          | 171 (76.0)          | 40 (67.8)           | <0.001  |

Values (continuous covariates) are reported as median (interquartile range) or number (%).

BMI, body mass index; CHD, coronary heart disease; CRP, C-reactive protein; CKD, chronic kidney disease; DM, diabetes mellitus;

eGFR, estimated glomerular filtration rate; HDL, high-density lipoprotein; HbA1c, glycated haemoglobin; MVD, microvascular disease;

SBP, systolic blood pressure; TC, total cholesterol; T1DM, type 1 diabetes.

**Supplementary Table 7.** Baseline characteristics among participants with T2DM by No. of MVD.

|                                   | N. of MVD           |                     |                     |                     | P value |
|-----------------------------------|---------------------|---------------------|---------------------|---------------------|---------|
|                                   | 0 (n =19,116)       | 1 (n =7,844)        | 2 (n =1,534)        | 3 (n =130)          |         |
| HbA1c, mmol/L                     | 49.9 (42.9-55.6)    | 50.7 (45.5-59.4)    | 52.0 (47.1-65.0)    | 55.5 (50.0-67.6)    | <0.001  |
| DM duration, y                    | 4.0 (1.0-7.0)       | 5.0 (2.0-10.0)      | 8.0 (4.0-15.0)      | 13.0 (6.0-19.0)     | <0.001  |
| Age, y                            | 60.0 (54.0-65.0)    | 62.0 (57.0-66.0)    | 63.0 (58.0-67.0)    | 63.0 (57.0-66.0)    | <0.001  |
| Women, n (%)                      | 7,849 (41.1)        | 2,941 (37.5)        | 524 (34.2)          | 35 (26.9)           | <0.001  |
| White, n (%)                      | 16,674 (87.2)       | 6,517 (83.1)        | 1,199 (78.2)        | 109 (83.9)          | <0.001  |
| Townsend deprivation index        | -1.4 (-3.3-1.9)     | -0.7 (-3.0-2.5)     | 0.1 (-2.6-3.2)      | 0.0 (-2.5-3.4)      | <0.001  |
| BMI, kg/m <sup>2</sup>            | 30.5 (27.3-34.4)    | 31.2 (27.9-35.3)    | 31.4 (28.3-35.5)    | 33.2 (29.9-37.4)    | <0.001  |
| Current smokers, n (%)            | 2,184 (11.4)        | 917 (11.7)          | 169 (11.0)          | 10 (7.7)            | 0.115   |
| SBP, mmHg                         | 142.0 (130.0-154.0) | 145.0 (133.0-159.0) | 148.0 (134.0-161.0) | 148.0 (137.0-160.0) | <0.001  |
| Heart rate, bpm                   | 73.0 (65.0-82.0)    | 75.0 (66.0-84.0)    | 75.0 (66.0-85.0)    | 77.0 (67.0-86.0)    | <0.001  |
| Alcohol consumption, g/d          | 5.7 (0.0-18.6)      | 2.3 (0.0-17.1)      | 1.3 (0.0-14.3)      | 1.3 (0.0-17.1)      | <0.001  |
| Sedentary time, h/d               | 5.0 (4.0-7.0)       | 5.0 (4.0-7.0)       | 5.0 (4.0-7.0)       | 5.5 (4.0-8.0)       | <0.001  |
| TC, mg/dL                         | 4.7 (4.0-5.3)       | 4.5 (3.9-5.1)       | 4.3 (3.7-4.9)       | 4.0 (3.6-4.7)       | <0.001  |
| HDL, mmol/L                       | 1.2 (1.0-1.3)       | 1.2 (1.0-1.3)       | 1.2 (1.0-1.3)       | 1.1 (0.9-1.2)       | <0.001  |
| CRP, mg/L                         | 2.1 (1.0-3.8)       | 2.2 (1.1-4.2)       | 2.2 (1.1-4.5)       | 2.5 (1.6-5.0)       | <0.001  |
| eGFR, ml/min/1.73 m <sup>2</sup>  | 94.8 (85.3-101.8)   | 92.0 (75.1-100.3)   | 84.9 (58.0-98.1)    | 66.3 (48.6-93.6)    | <0.001  |
| History of CHD, n (%)             | 2,769 (14.5)        | 1,627 (20.7)        | 419 (27.3)          | 57 (43.9)           | <0.001  |
| History of stroke, n (%)          | 518 (2.7)           | 336 (4.3)           | 90 (5.9)            | 11 (8.5)            | <0.001  |
| Antihyperglycemic drug use, n (%) | 13,478 (70.5)       | 6,269 (79.9)        | 1,359 (88.6)        | 123 (94.6)          | <0.001  |
| Antihypertensive drug use, n (%)  | 10,094 (52.8)       | 5,307 (67.7)        | 1,175 (76.6)        | 109 (83.9)          | <0.001  |
| Statin use, n (%)                 | 11,097 (58.1)       | 5,238 (66.8)        | 1,102 (71.8)        | 94 (72.3)           | <0.001  |

Values (continuous covariates) are reported as median (interquartile range) or number (%).

BMI, body mass index; CHD, coronary heart disease; CRP, C-reactive protein; CKD, chronic kidney disease; DM, diabetes mellitus; eGFR, estimated glomerular filtration rate; HDL, high-density lipoprotein; HbA1c, glycated haemoglobin; MVD, microvascular disease; SBP, systolic blood pressure; TC, total cholesterol; T2DM, type 2 diabetes.

**Supplementary Table 8.** HR and 95% CI for the associations of different covariates with the risk of HF.

| Covariates                           | T1DM              |         | T2DM              |         |
|--------------------------------------|-------------------|---------|-------------------|---------|
|                                      | HR (95% CI)       | P value | HR (95% CI)       | P value |
| Age per year increase                | 1.09 (1.07, 1.13) | <0.001  | 1.08 (1.07, 1.08) | <0.001  |
| Men                                  | 1.06 (0.71, 1.57) | 0.788   | 1.46 (1.32, 1.61) | <0.001  |
| TDI per SD increase                  | 0.94 (0.79, 1.13) | 0.523   | 1.15 (1.11, 1.20) | <0.001  |
| Nonwhite                             | 0.87 (0.41, 1.88) | 0.727   | 1.09 (0.96, 1.24) | 0.180   |
| History of CHD                       | 2.03 (1.37, 3.01) | <0.001  | 2.42 (2.21, 2.65) | <0.001  |
| History of stroke                    | 1.46 (0.67, 3.09) | 0.323   | 1.42 (1.20, 1.69) | <0.001  |
| BMI per SD increase                  | 1.28 (1.07, 1.52) | 0.006   | 1.32 (1.26, 1.38) | <0.001  |
| Ever smoke                           | 1.40 (0.99, 1.97) | 0.054   | 1.32 (1.21, 1.44) | <0.001  |
| Alcohol consumption per SD increase  | 0.83 (0.67, 1.04) | 0.111   | 1.00 (0.96, 1.04) | 0.946   |
| Sedentary time per SD increase       | 1.08 (0.91, 1.28) | 0.353   | 1.02 (0.98, 1.06) | 0.321   |
| HbA1c per SD increase                | 1.32 (1.11, 1.57) | 0.002   | 1.11 (1.08, 1.15) | <0.001  |
| DM duration per SD increase          | 1.09 (0.90, 1.32) | 0.383   | 1.06 (1.02, 1.10) | 0.002   |
| SBP per SD increase                  | 1.10 (0.92, 1.30) | 0.308   | 1.03 (0.99, 1.07) | 0.204   |
| TC per SD increase                   | 0.92 (0.44, 1.91) | 0.817   | 0.89 (0.74, 1.07) | 0.205   |
| LDL-C per SD increase                | 1.10 (0.55, 2.21) | 0.778   | 1.17 (0.98, 1.40) | 0.077   |
| HDL-C per SD decrease                | 1.00 (0.73, 1.37) | 0.984   | 1.02 (0.96, 1.08) | 0.573   |
| CRP per SD increase                  | 1.10 (0.94, 1.28) | 0.230   | 1.09 (1.05, 1.12) | <0.001  |
| Heart rate per SD increase           | 1.26 (1.06, 1.51) | 0.011   | 1.08 (1.03, 1.12) | 0.001   |
| Antihyperglycemic medication use     |                   |         |                   |         |
| Metformin alone                      | Ref.              | -       | Ref.              |         |
| Insulin alone                        | 0.52 (0.15, 1.77) | 0.292   | 1.54 (1.30, 1.82) | <0.001  |
| Other antihyperglycemic drug classes | 0.63 (0.11, 3.48) | 0.598   | 1.11 (0.97, 1.26) | 0.127   |
| 2 drug classes                       | 0.42 (0.11, 1.52) | 0.186   | 1.18 (1.05, 1.32) | 0.005   |
| ≥3 drug classes                      | 0.61 (0.12, 2.98) | 0.538   | 1.16 (0.96, 1.39) | 0.125   |
| With DM but not treated              | 0.56 (0.05, 5.89) | 0.632   | 0.88 (0.77, 1.00) | 0.057   |
| Antihypertensive medication use      |                   |         |                   |         |



| No hypertension                     | Ref.              | -     | Ref.              |        |
|-------------------------------------|-------------------|-------|-------------------|--------|
| ACEI alone                          | 1.23 (0.60, 2.52) | 0.578 | 1.53 (1.24, 1.89) | <0.001 |
| ARB alone                           | 0.58 (0.20, 1.69) | 0.321 | 1.64 (1.30, 2.08) | <0.001 |
| BB alone                            | 2.11 (0.92, 4.81) | 0.077 | 1.73 (1.40, 2.13) | <0.001 |
| CCB alone                           | 1.04 (0.43, 2.54) | 0.931 | 1.61 (1.30, 2.00) | <0.001 |
| Other antihypertensive drug classes | 0.85 (0.41, 1.77) | 0.663 | 1.57 (1.29, 1.91) | <0.001 |
| 2 drug classes                      | 1.67 (0.84, 3.35) | 0.146 | 2.00 (1.65, 2.43) | <0.001 |
| ≥3 drug classes                     | 0.65 (0.21, 2.02) | 0.458 | 2.56 (2.01, 3.25) | <0.001 |
| With hypertension but not treated   | 1.06 (0.50, 2.23) | 0.888 | 1.10 (0.90, 1.36) | 0.350  |
| Statin use                          | 0.95 (0.63, 1.45) | 0.826 | 0.89 (0.81, 0.98) | 0.018  |

Adjustments were made for No. of MCD, age, sex, ethnicity, BMI, SBP, TC, HDL, LDL-C, smoking status, Townsend deprivation index, alcohol consumption, sedentary time, heart rate, history of CHD, history of stroke, CRP, HbA1c, antihypertensive drugs, antihyperglycemic drugs, statin use, and diabetes duration.

ACEI, angiotensin-converting enzyme inhibitor; ARB, angiotensin-receptor blocker; BB,  $\beta$ -blocker; CCB, calcium channel blocker; BMI, body mass index; CI, confidence interval; CRP, C-reactive protein; CHD, coronary heart disease; DM, diabetes mellitus; HR, hazard ratio; HbA1c, glycated haemoglobin; HDL-C, high-density lipoprotein cholesterol; LDL-C, low-density lipoprotein cholesterol; TC, total cholesterol; HF, heart failure; MVD, microvascular disease; SD, standard deviation; T1DM, type 1 diabetes mellitus; T2DM, type 2 diabetes mellitus; TDI, Townsend deprivation index

**Supplementary Table 9.** HR and 95% CI for the associations between different types of MVD and risk of incident HF among participants with T1DM and T2DM, stratified by sex\*.

| <b>Women</b>    |             | <b>No. of MVD</b> |                   |                     |  |
|-----------------|-------------|-------------------|-------------------|---------------------|--|
| <b>T1DM</b>     | 0           | 1                 | 2                 | 3                   |  |
| Events/person-y | 7/4,406     | 23/3,138          | 28/1,031          | 4/183               |  |
| HR (95% CI)     | Ref.        | 3.05 (1.25, 7.44) | 8.41 (3.30, 21.6) | 12.8 (3.26, 50.19)  |  |
| <b>T2DM</b>     | 0           | 1                 | 2                 | 3                   |  |
| Events/person-y | 369/89,276  | 260/31,934        | 95/5,266          | 10/324              |  |
| HR (95% CI)     | Ref.        | 1.37 (1.16, 1.62) | 2.12 (1.66, 2.71) | 3.75 (1.77, 10.89)  |  |
| <b>Men</b>      |             | <b>No. of MVD</b> |                   |                     |  |
| <b>T1DM</b>     | 0           | 1                 | 2                 | 3                   |  |
| Events/person-y | 13/4,808    | 28/3,619          | 27/1,130          | 15/246              |  |
| HR (95% CI)     | Ref.        | 1.31 (0.64, 2.67) | 3.76 (1.80, 7.84) | 10.27 (4.29, 24.62) |  |
| <b>T2DM</b>     | 0           | 1                 | 2                 | 3                   |  |
| Events/person-y | 825/124,106 | 684/50,195        | 228/9,556         | 44/729              |  |
| HR (95% CI)     | Ref.        | 1.52 (1.37, 1.68) | 2.20 (1.89, 2.57) | 4.35 (3.16, 5.94)   |  |

Adjustments were made for age, ethnicity, BMI, SBP, TC, HDL-C, LDL-C, smoking status, Townsend deprivation index, alcohol consumption, sedentary time, heart rate, history of CHD, history of stroke, CRP, HbA1c, antihypertensive drugs, antihyperglycemic drugs, statin use, and diabetes duration.

\*For T1DM and T2DM, the *P* for interaction for sex were 0.581 and 0.677, respectively.

CI, confidence interval; HR, hazard ratio; MVD, microvascular disease; T1DM, type 1 diabetes mellitus; T2DM, type 2 diabetes mellitus.

**Supplementary Table 10.** Sensitivity analysis for the HR and 95% CI for the associations between No. of MVD and risk of incident HF among participants with T1DM or T2DM.

| <b>Exclusion of missing data</b>                                |               | <b>No. of MVD</b> |                    |                     |  |
|-----------------------------------------------------------------|---------------|-------------------|--------------------|---------------------|--|
| <b>T1DM</b>                                                     | 0             | 1                 | 2                  | 3                   |  |
| Events/person-y                                                 | 13/6,661      | 37/4,892          | 31/1,423           | 12/273              |  |
| HR (95% CI)                                                     | Ref.          | 2.44 (1.26, 4.74) | 4.45 (2.17, 9.12)  | 10.34 (4.16, 25.80) |  |
| <b>T2DM</b>                                                     | 0             | 1                 | 2                  | 3                   |  |
| Events/person-y                                                 | 812/145,950   | 678/57,942        | 208/10,109         | 37/721              |  |
| HR (95% CI)                                                     | Ref.          | 1.52 (1.37, 1.69) | 2.11 (1.80, 2.48)  | 4.06 (2.89, 5.71)   |  |
| <b>Redefined type 1 DM</b>                                      |               | <b>No. of MVD</b> |                    |                     |  |
| <b>T1DM</b>                                                     | 0             | 1                 | 2                  | 3                   |  |
| Events/person-y                                                 | 11/6,665      | 45/5,263          | 40/1,692           | 16/332              |  |
| HR (95% CI)                                                     | Ref.          | 3.16 (1.59, 6.29) | 6.57 (3.22, 13.39) | 17.59 (7.35, 42.08) |  |
| <b>T2DM</b>                                                     | 0             | 1                 | 2                  | 3                   |  |
| Events/person-y                                                 | 1,206/215,933 | 950/83,622        | 338/15,292         | 54/1,150            |  |
| HR (95% CI)                                                     | Ref.          | 1.46 (1.34, 1.60) | 2.23 (1.96, 2.53)  | 3.70 (2.80, 4.90)   |  |
| <b>Using only the ICD codes to define MVD</b>                   |               | <b>No. of MVD</b> |                    |                     |  |
| <b>T1DM</b>                                                     | 0             | 1                 | 2                  | 3                   |  |
| Events/person-y                                                 | 73/15,194     | 44/2,764          | 22/462             | 6/143               |  |
| HR (95% CI)                                                     | Ref.          | 2.00 (1.34, 3.01) | 5.90 (3.43, 10.14) | 7.53 (2.82, 20.12)  |  |
| <b>T2DM</b>                                                     | 0             | 1                 | 2                  | 3                   |  |
| Events/person-y                                                 | 2,219/298,088 | 244/12,287        | 41/865             | 11/147              |  |
| HR (95% CI)                                                     | Ref.          | 1.70 (1.49, 1.95) | 3.09 (2.25, 4.24)  | 3.79 (2.07, 6.93)   |  |
| <b>Exclusion of non-HF deaths as a potential competing risk</b> |               | <b>No. of MVD</b> |                    |                     |  |
| <b>T1DM</b>                                                     | 0             | 1                 | 2                  | 3                   |  |
| Events/person-y                                                 | 11/8,760      | 24/6,094          | 25/1,714           | 6/267               |  |
| HR (95% CI)                                                     | Ref.          | 1.94 (0.91, 4.13) | 5.89 (2.70, 12.85) | 9.40 (3.09, 28.61)  |  |
| <b>T2DM</b>                                                     | 0             | 1                 | 2                  | 3                   |  |
| Events/person-y                                                 | 733/197,235   | 501/71,600        | 142/11,954         | 19/733              |  |
| HR (95% CI)                                                     | Ref.          | 1.40 (1.25, 1.58) | 1.87 (1.55, 2.25)  | 3.25 (2.04, 5.18)   |  |

Adjustments were made for age, sex, ethnicity, BMI, SBP, TC, HDL, smoking status, Townsend deprivation index, alcohol consumption, sedentary time, heart rate, history of CHD, history of stroke, CRP, HbA1c, antihypertensive drugs, antihyperglycemic drugs, statin use, and diabetes duration.

CI, confidence interval; HR, hazard ratio; MVD, microvascular disease; T1DM, type 1 diabetes; T2DM, type 2 diabetes.

**Supplementary Figure 1.** Flowchart of the study protocol.

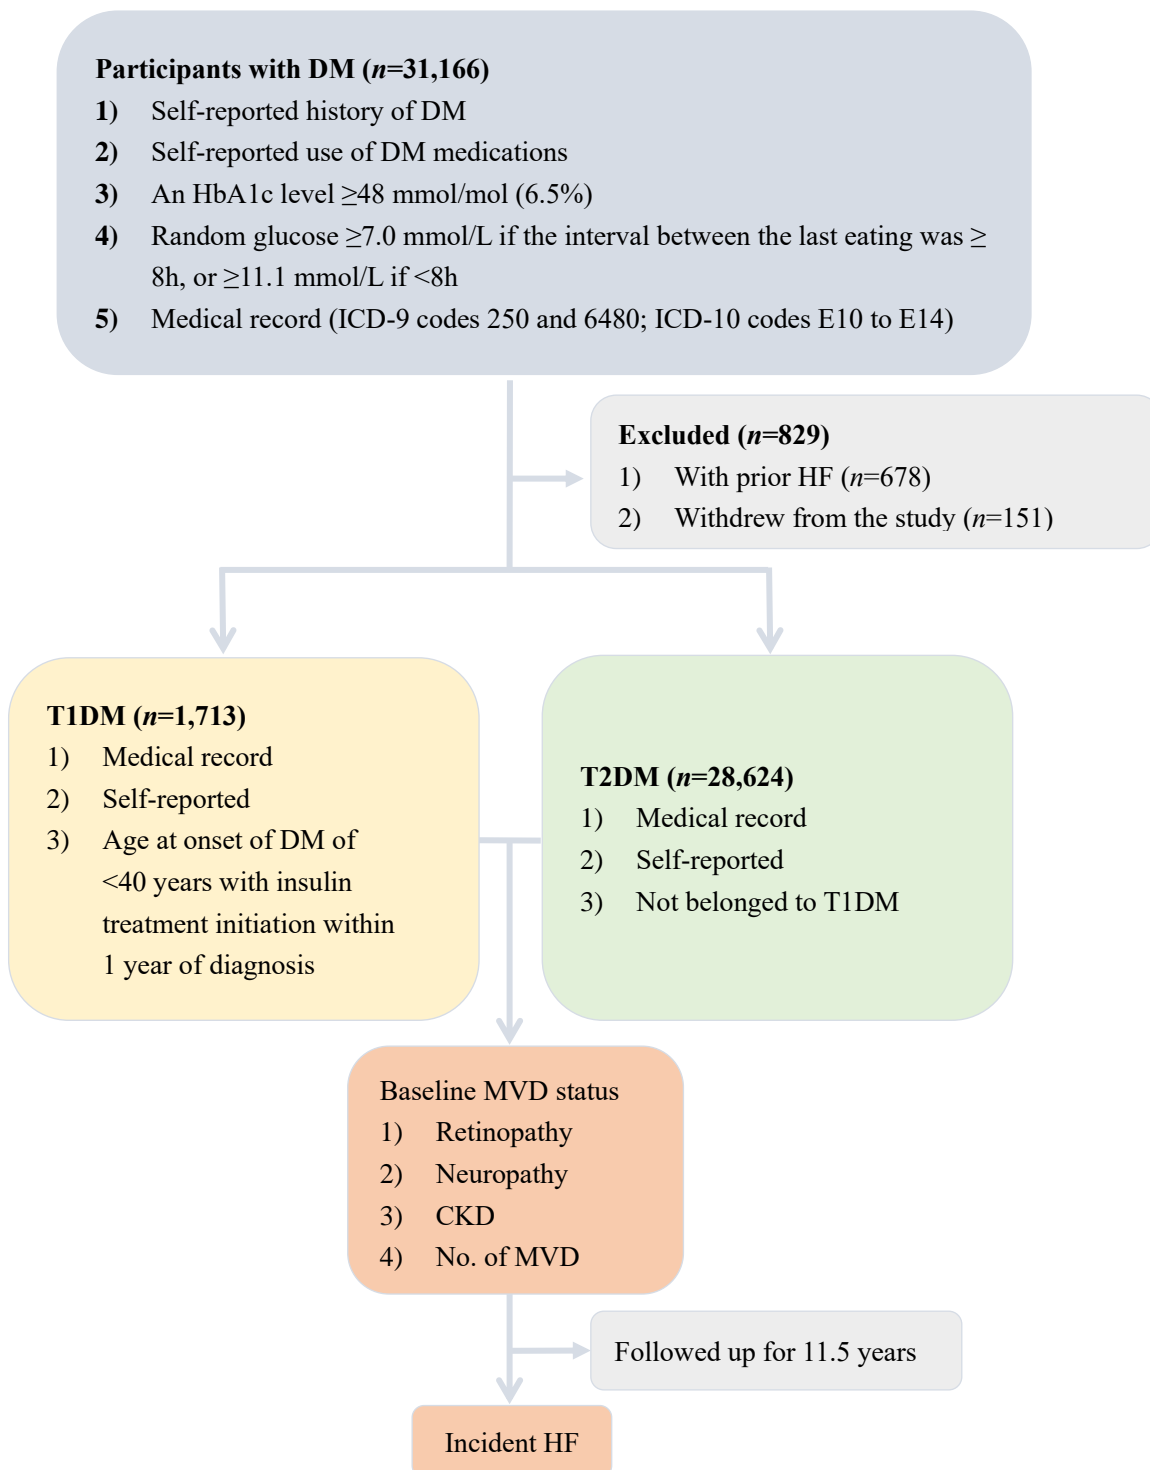

CKD, chronic kidney disease; HF, heart failure; MVD, microvascular disease

**Supplementary Figure 2.** Venn diagram showing No. of participants with different types of MVD at baseline.

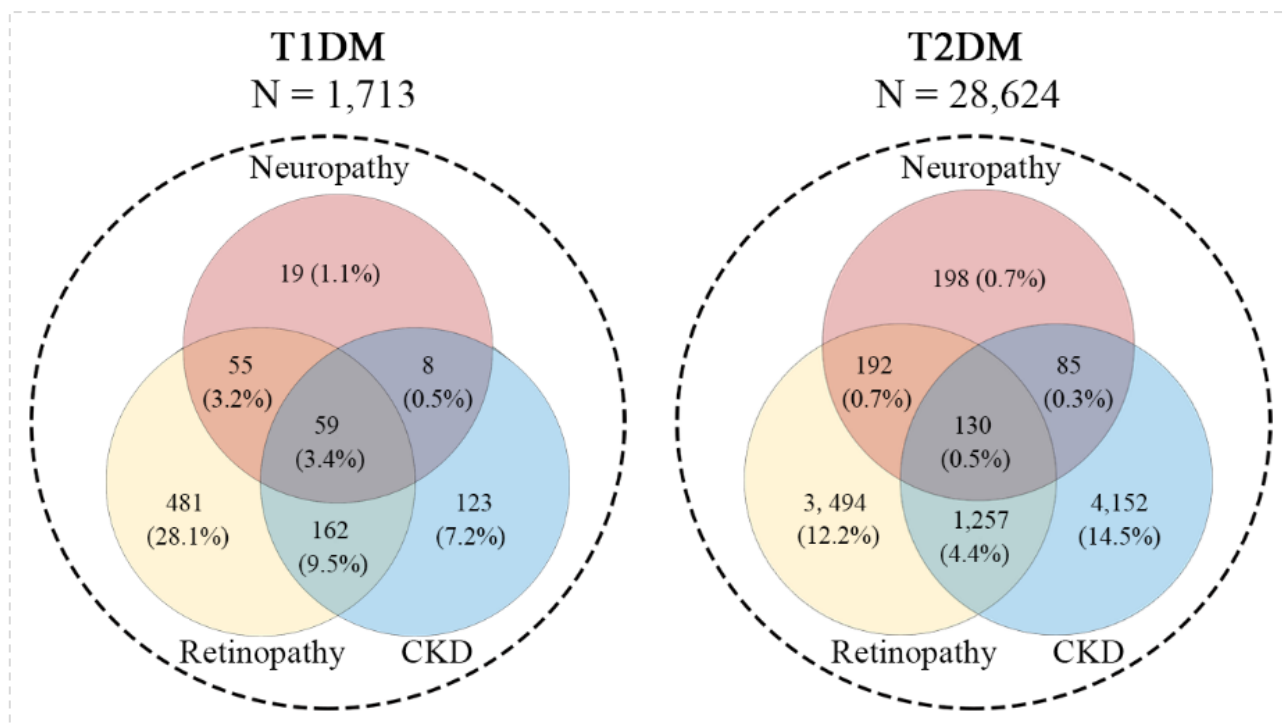

CKD, chronic kidney disease; T1DM, type 1 diabetes mellitus; T2DM, type 2 diabetes mellitus

**Supplementary Figure 3.** Kaplan-Meier plot showing risk of HF by No. of MVD among participants with T1DM or T2DM.

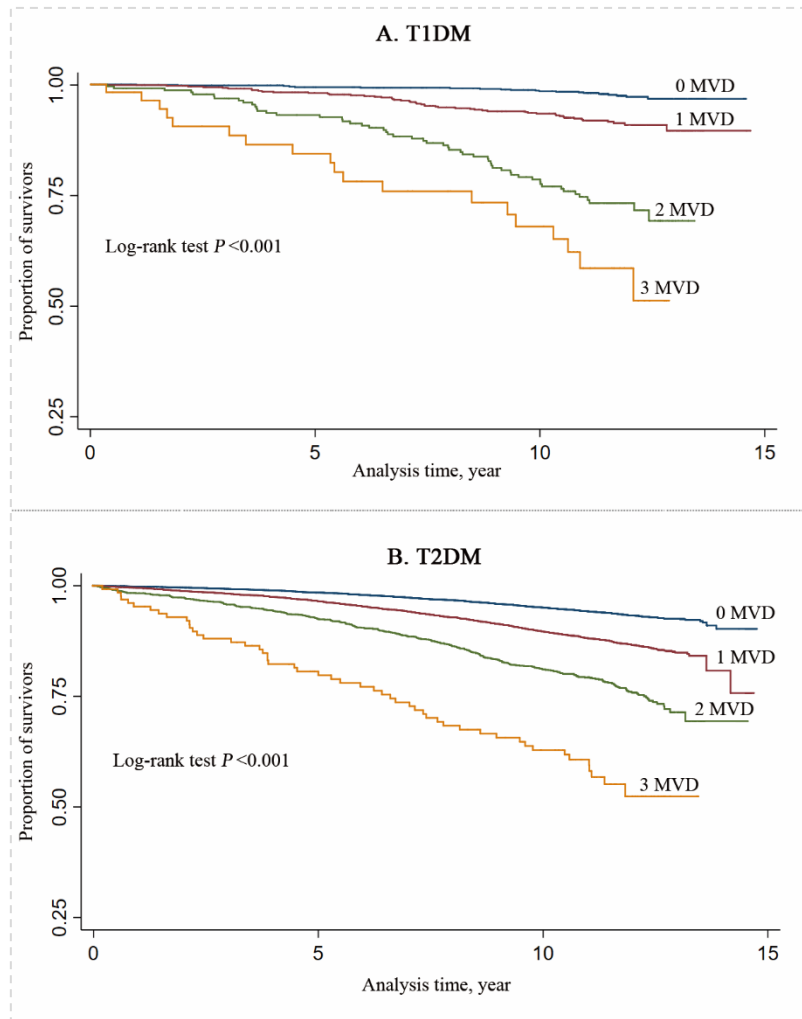

MVD, microvascular disease; T1DM, type 1 diabetes mellitus; T2DM, type 2 diabetes mellitus

**Supplementary Figure 4.** Kaplan-Meier plot showing risk of HF by individual MVD among participants with T1DM or T2DM.

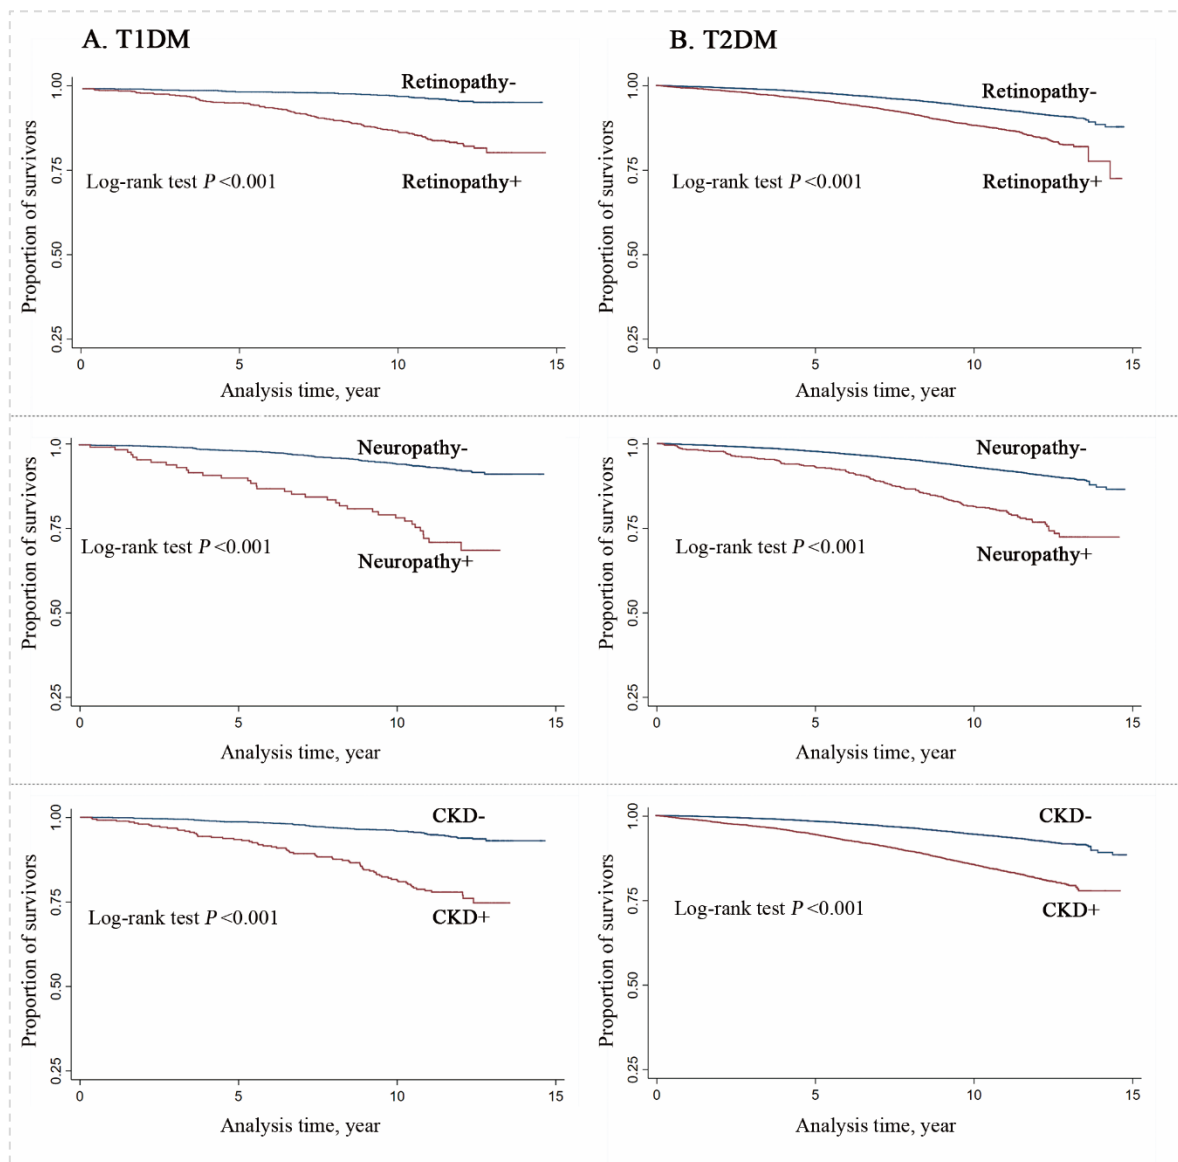

CKD, chronic kidney disease; T1DM, type 1 diabetes mellitus; T2DM, type 2 diabetes mellitus
